# Supplementary material for: Assessment of the Genetic Diversity of Echinococcus multilocularis from Copro-Isolated Eggs
Source: MDPI journal article supplement (doi:10.3390/pathogens10101296), 2021-10-08

112 egg-batches => 102 with EMSB electrophoregrams

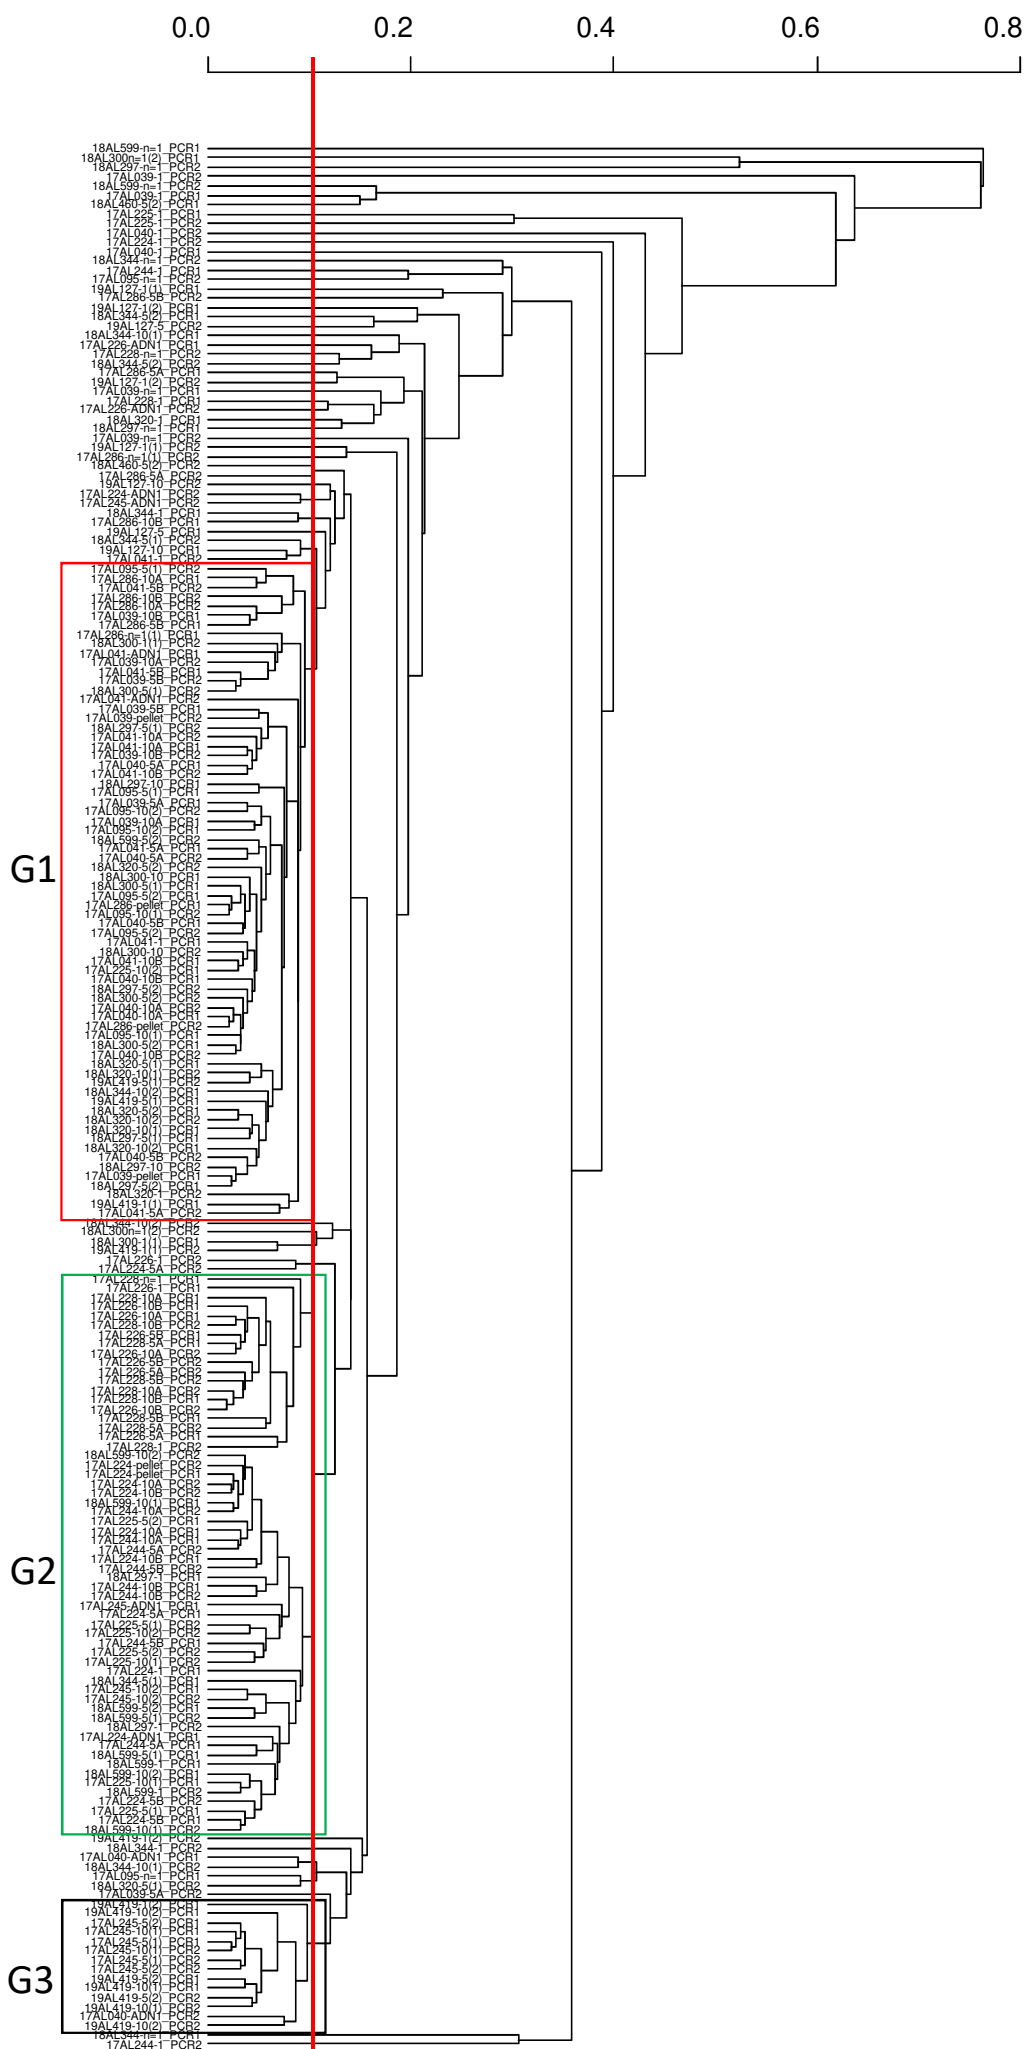

(b)

Pearson correlation coefficient =  $r > 0.75$  – 73 egg-batches

G2

G3

G1

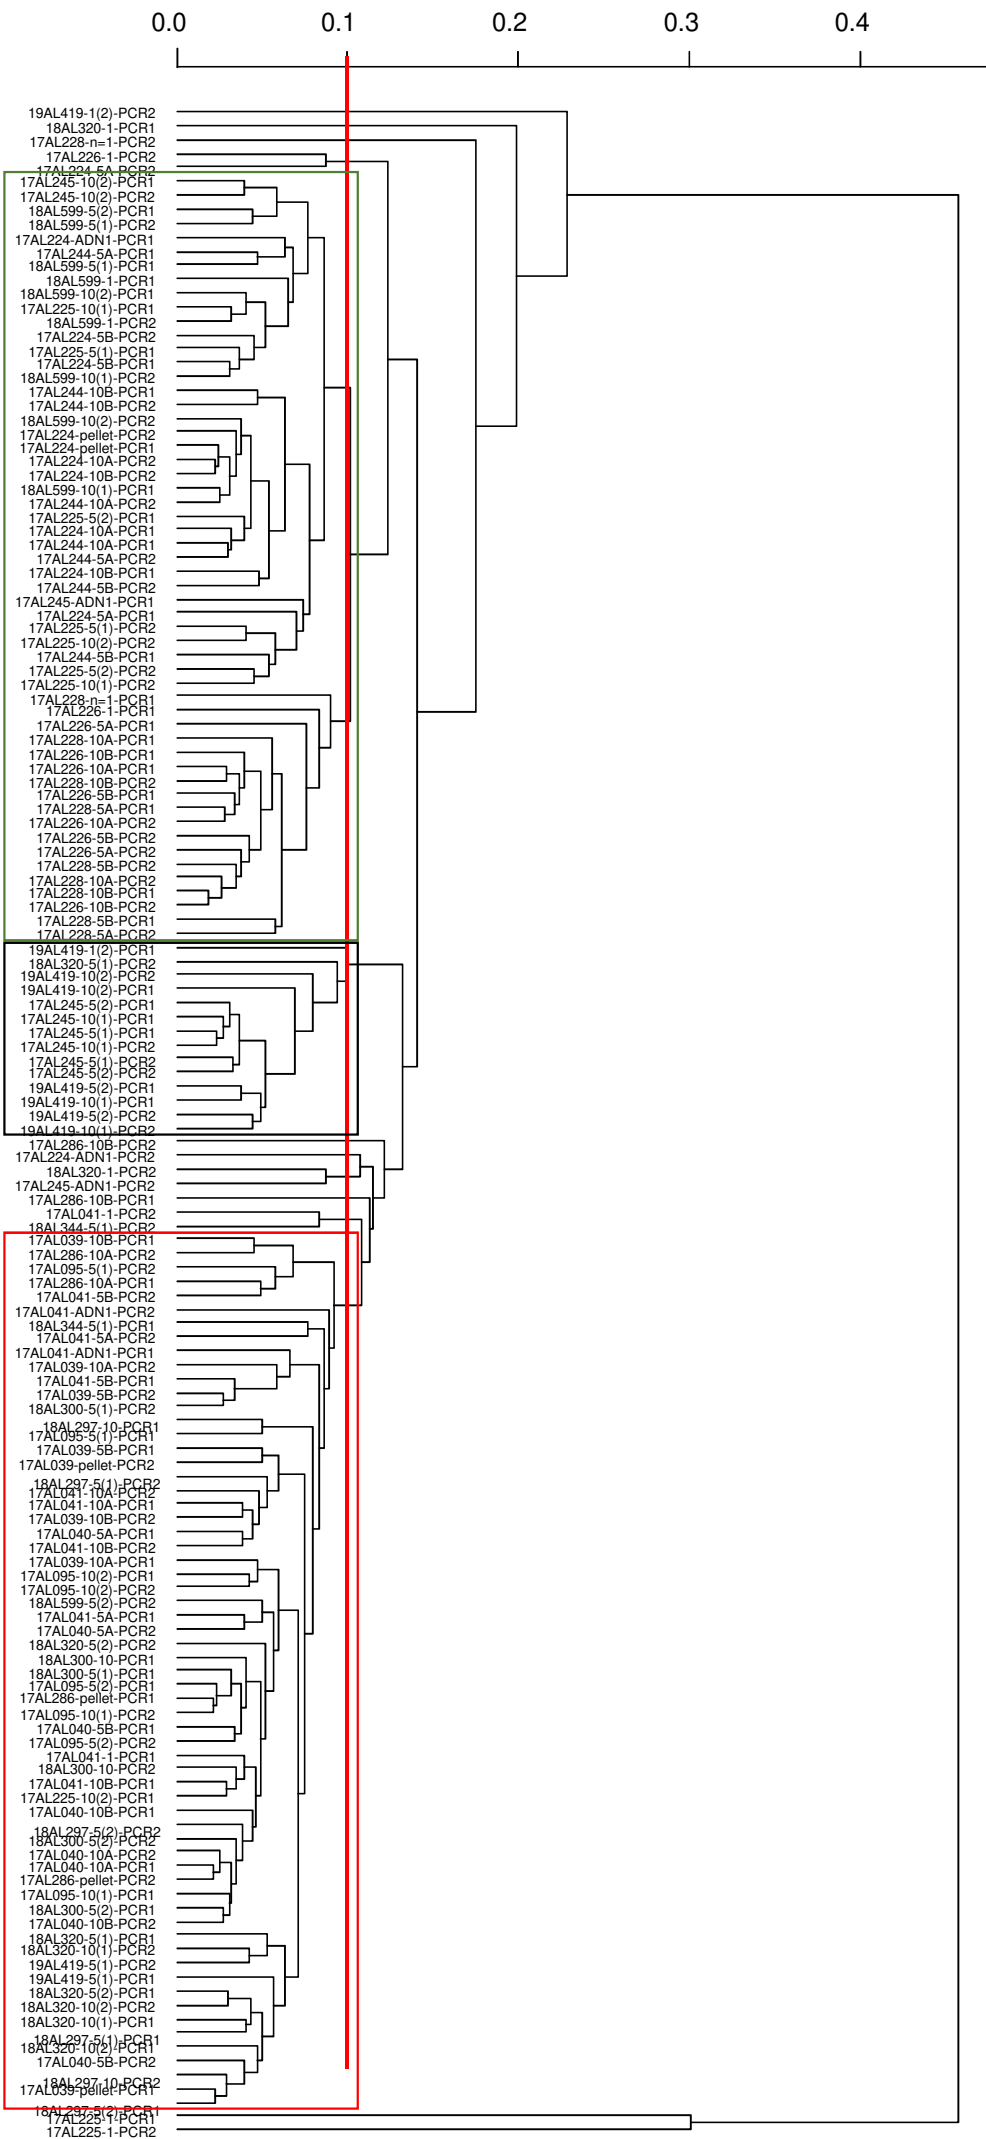

(c)

Pearson correlation coefficient =  $r > 0.8$  – 68 egg-batches

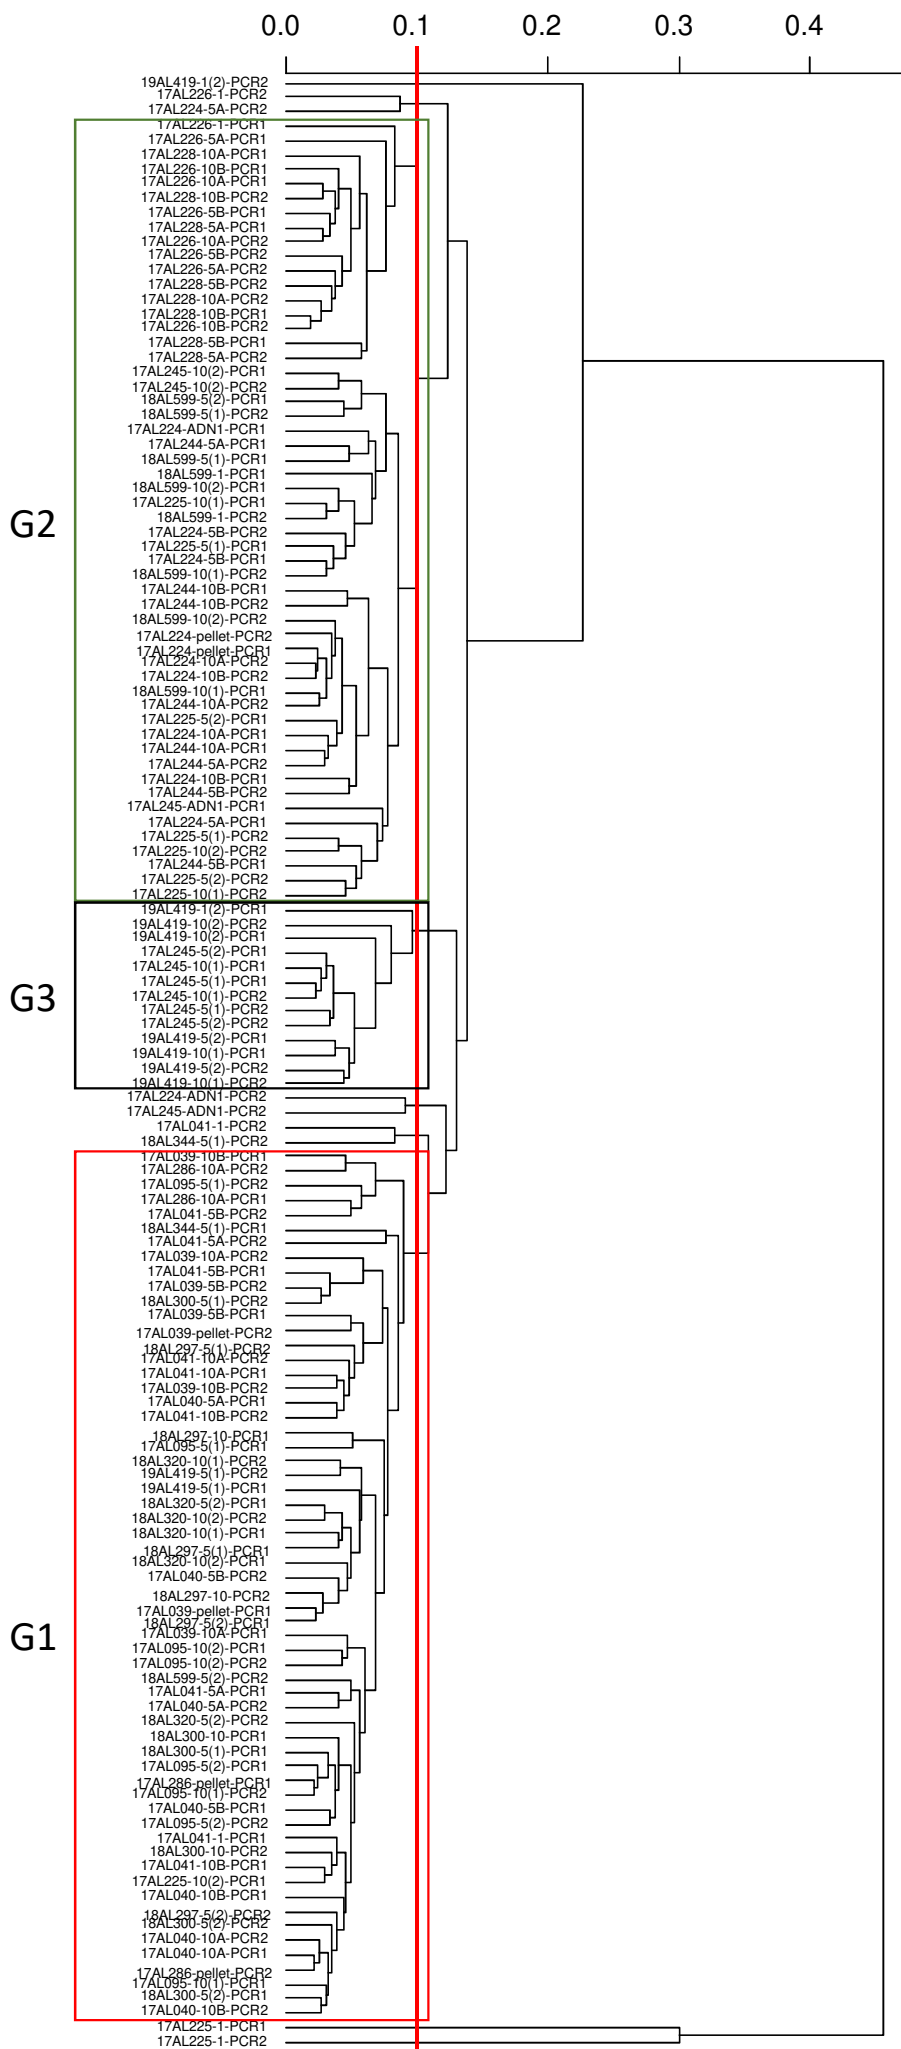

(d)

Pearson correlation coefficient =  $r > 0.9$  – 49 egg-batches

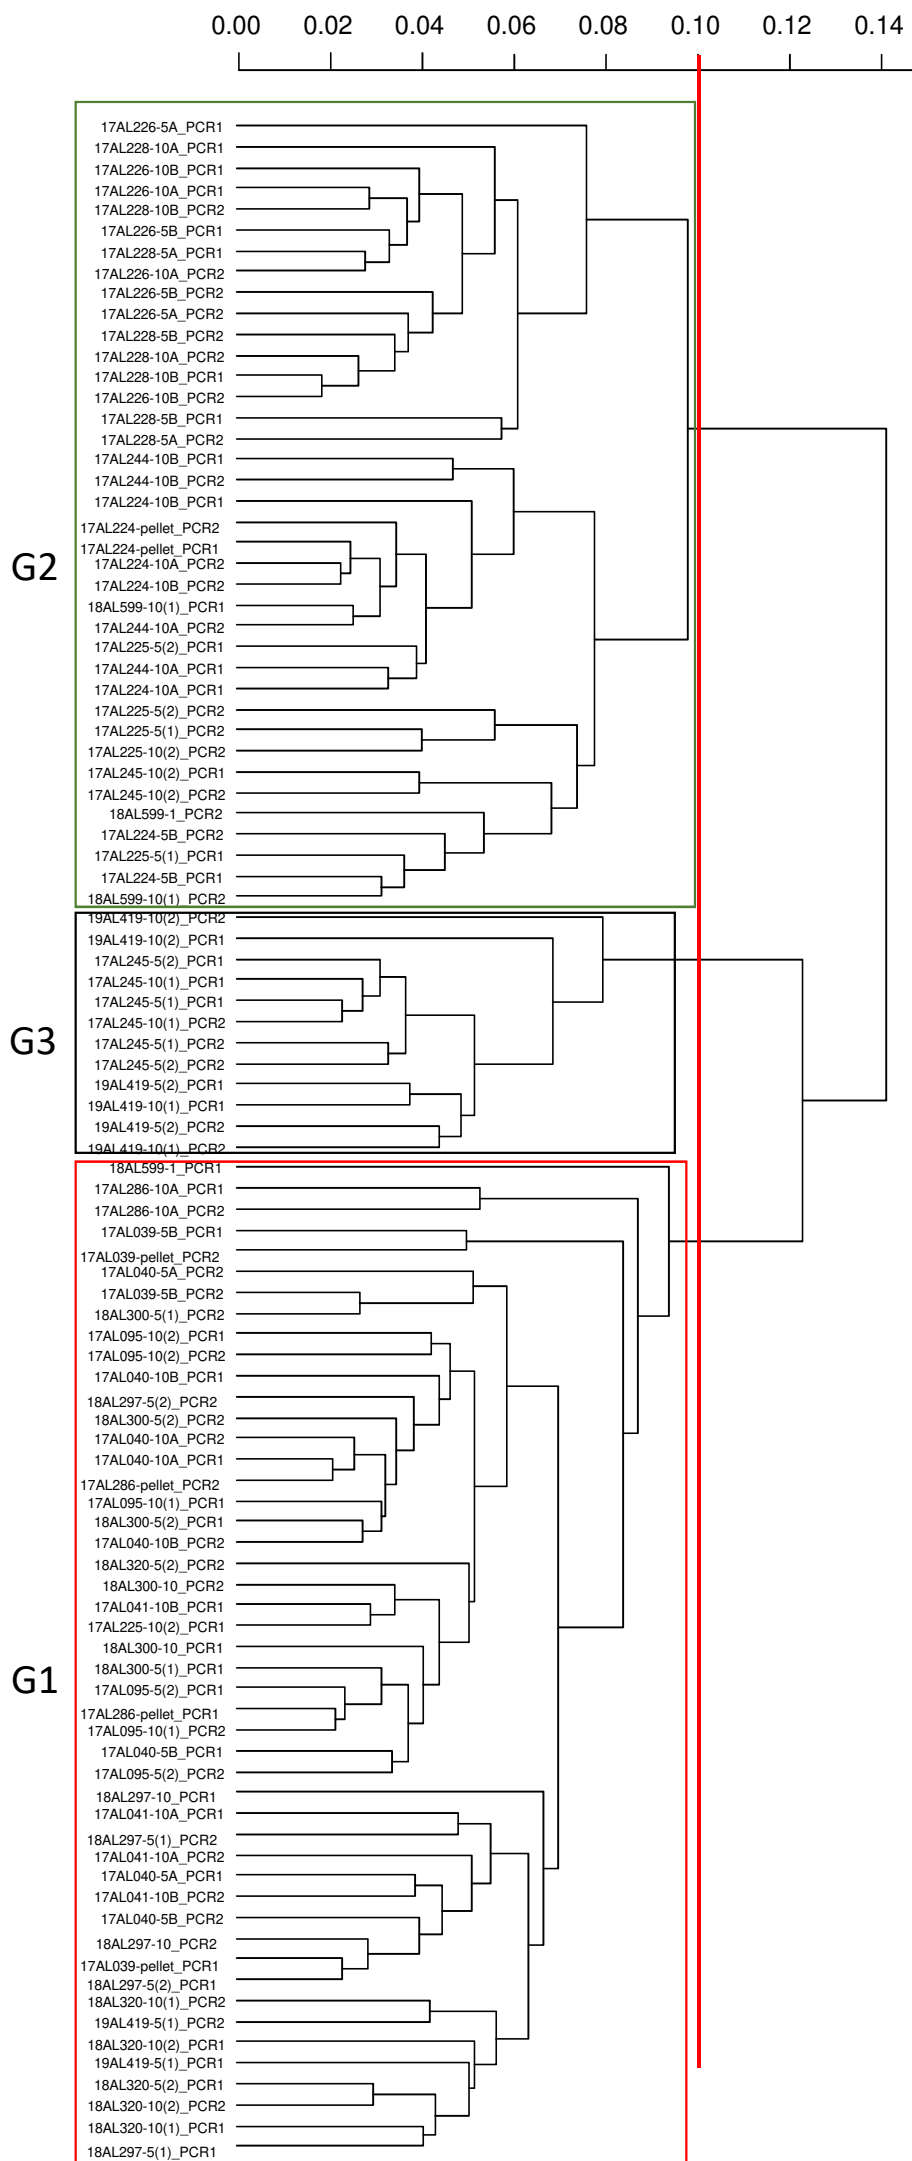

Supplement: s1 [file s1]
